# Supplementary material for: Thresholds adjustments and impact on clinical performance of three FIT assays in a colorectal cancer screening program
Source: publisher site journal article supplement (doi:10.1515/cclm-2025-0546), 2025-11-10
Supplement: Supplementary file 1 [file j_cclm-2025-0546_suppl_002.docx]

**Supplementary Figure 1.** Method comparisons for FIT results (ug/g) of the three FIT assays. Dashed lines represent the line of equality (y = x), while solid lines represent the fitted regression line.


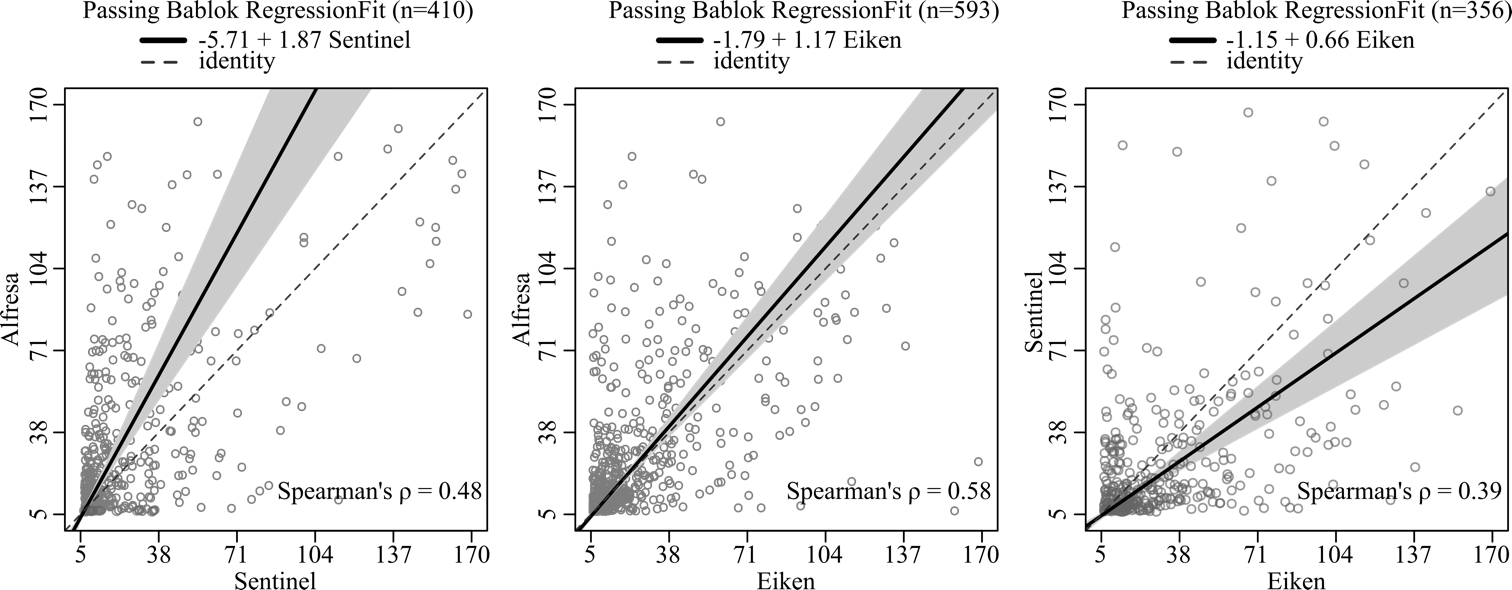


**Supplementary** **Figure 2.** The ROC curves obtained for each FIT assay (Eiken Chemical, Sentinel Diagnostics, and Alfresa Pharma) for the detection of AN among participants who underwent colonoscopy (n = 327).

**
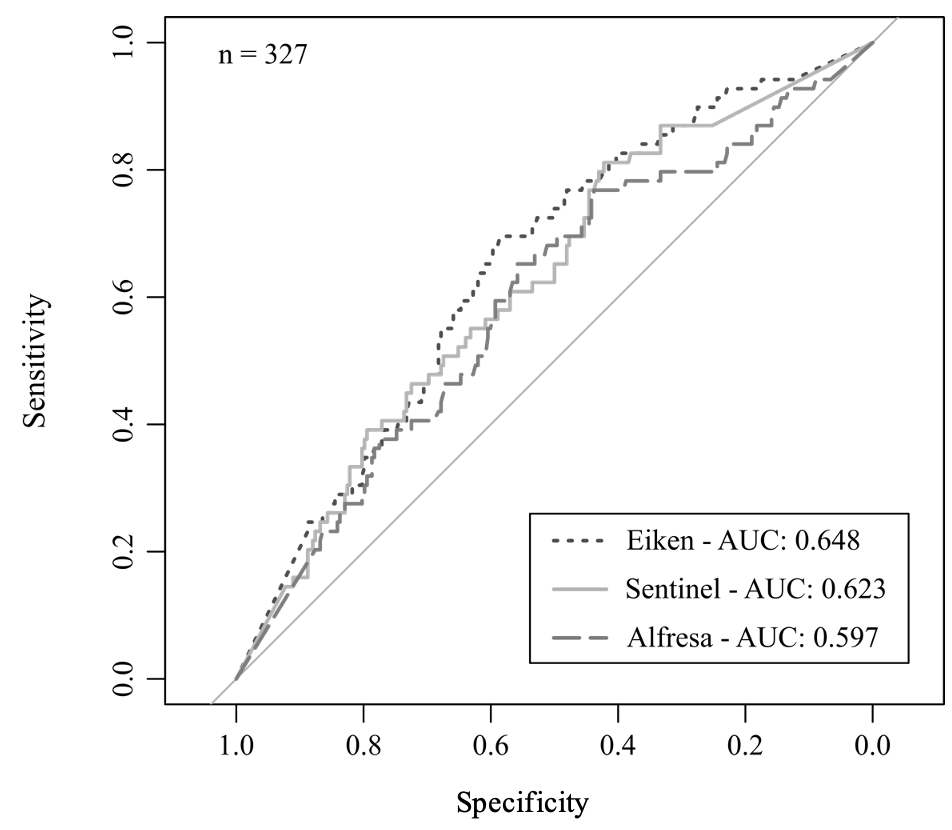
**

**Supplementary Table 1**. Concordance tables of all FIT results and manufacturers. (A) Without threshold adjustment; (B) With adjusted thresholds.

**Supplementary Table 2.** Concordance tables of FIT results within the reportable range of the assays for all manufacturers. (A) Without threshold adjustment; (B) With adjusted thresholds.

**Supplementary Table 3.** Concordance metrics of FIT results for subjects undergoing colonoscopy (n = 327), using non-adjusted and adjusted thresholds. Values in parentheses indicate 95% confidence intervals.

| **n=327** | **Comparison for each pair** | **Concordance rate** | **Cohen kappa** | **P-value** |
| --- | --- | --- | --- | --- |
| Non adjusted thresholds | Eiken (35.00 μg/g) - Sentinel (29.75 μg/g) | 63% (58% - 50%) | 27% (17% - 37%) | 2.77E-04 |
| Sentinel (29.75 μg/g) - Alfresa (35.00 μg/g) | 63% (56% - 23%) | 28% (16% - 35%) | 4.91E-08 |
| Alfresa (35.00 μg/g) - Eiken (35.00 μg/g) | 66% (59% - 42%) | 32% (18% - 39%) | 0.07 |
| Adjusted thresholds | Eiken (35.00 μg/g) - Sentinel (21.60 μg/g) | 62% (57% - 58%) | 25% (15% - 36%) | 0.1491 |
| Alfresa (39.20 μg/g) - Eiken (35.00 μg/g) | 68% (62% - 48%) | 35% (25% - 45%) | 0.7708 |

**Supplementary** **Table 4.** Concordance metrics between FIT result and AN finding at colonoscopy for the colonoscopy subgroup using non-adjusted and adjusted thresholds. Values in parentheses indicate 95% confidence intervals.

| **n=327** | **Company (threshold)** | **Concordance rate** | **Cohen kappa** |
| --- | --- | --- | --- |
| Non adjusted thresholds | Eiken (35.00 μg/g) | 57% (52% - 63%) | 16% (7% - 24%) |
| Sentinel (29.75 μg/g) | 62% (56% - 67%) | 13% (2% - 23%) |
| Alfresa (35.00 μg/g) | 50% (45% - 56%) | 9% (1% - 17%) |
| Adjusted thresholds | Sentinel (21.60 μg/g) | 57% (52% - 63%) | 11% (2%- 20%) |
| Alfresa (39.20 μg/g) | 55% (49% - 60%) | 12% (4% - 21%) |
